# Supplementary material for: Growth behavior of Au/Cu2−xS hybrids and their plasmon-enhanced dual-functional catalytic activity
Source: Royal Society of Chemistry journal article supplement (doi:10.1039/c9ce00981g), 2019-01-01
Supplement: c9ce00981g1.pdf [file c9ce00981g1.pdf]

## Supporting information

# Growth Behavior of Au/Cu<sub>2-x</sub>S Hybrids and Their Plasmon-enhanced Dual-functional Catalytic Activity

*Liang Ma<sup>a</sup>, You-Long Chen<sup>a</sup>, Xin Yang<sup>a</sup>, Hai-Xia Li<sup>a</sup>, Si-Jing Ding<sup>b</sup>, Hua-Yi Hou<sup>a</sup>,  
Lun Xiong<sup>a</sup>, Ping-Li Qin<sup>a</sup>, Xiang-Bai Chen<sup>a</sup>*

*<sup>a</sup> Hubei Key Laboratory of Optical Information and Pattern Recognition, Wuhan  
Institute of Technology, Wuhan, 430205, P. R. China.*

*<sup>b</sup> School of Mathematics and Physics, China University of Geosciences (Wuhan),  
Wuhan 430074, Wuhan, P. R. China.*

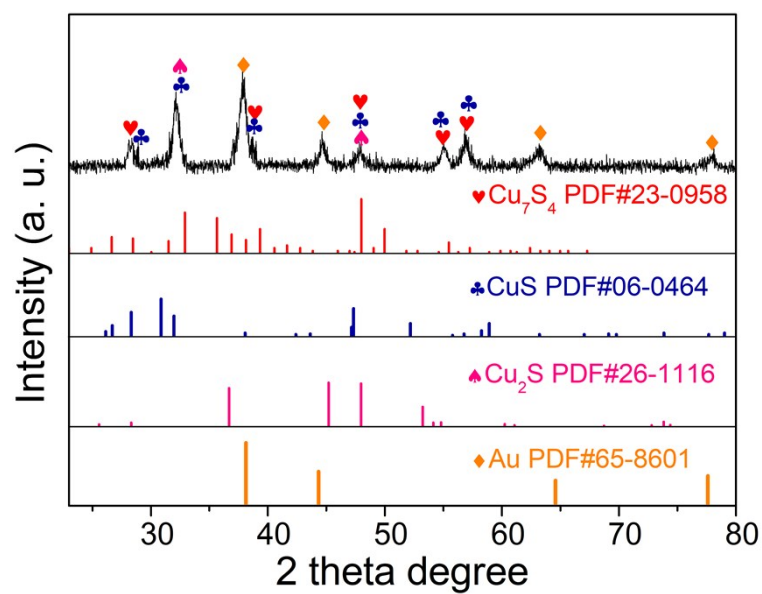

**Figure S1.** XRD pattern of half-shell Au/Cu<sub>2-x</sub>S hybrids.

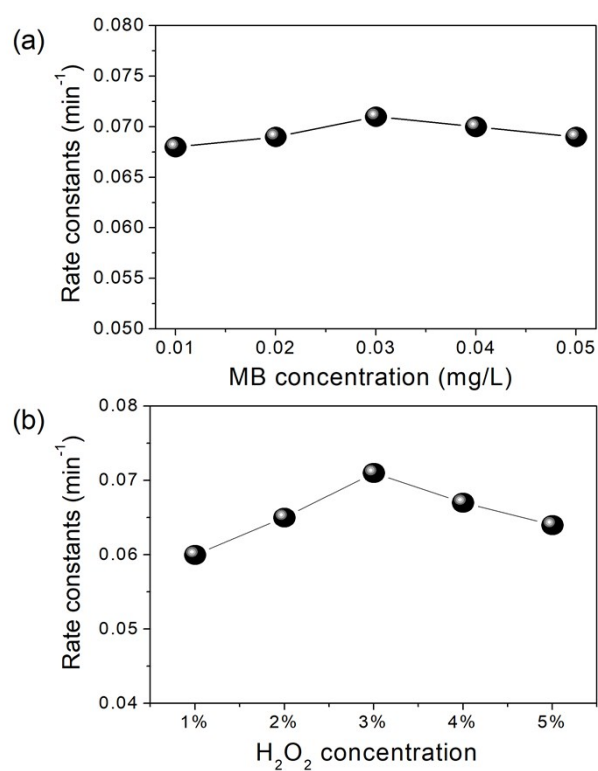

**Figure S2.** Fenton-like catalytic activity of half-shell Au/Cu<sub>2-x</sub>S tested by changing the concentration of MB (a) and H<sub>2</sub>O<sub>2</sub> (b).

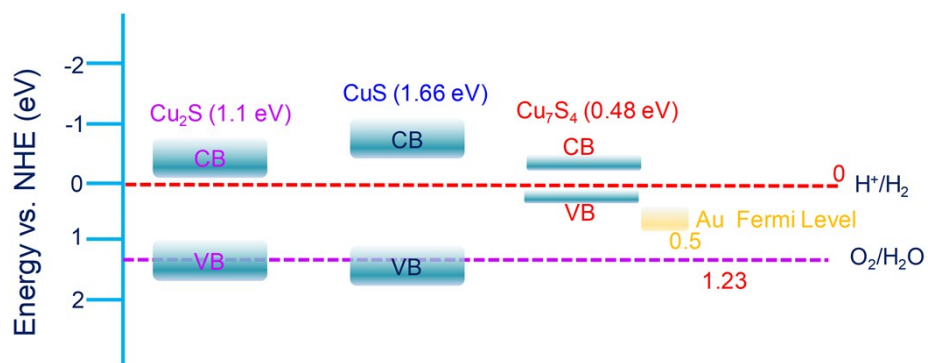

**Figure S3.** Schematic illustration of energy band diagram of Au/Cu<sub>2-x</sub>S hybrids.

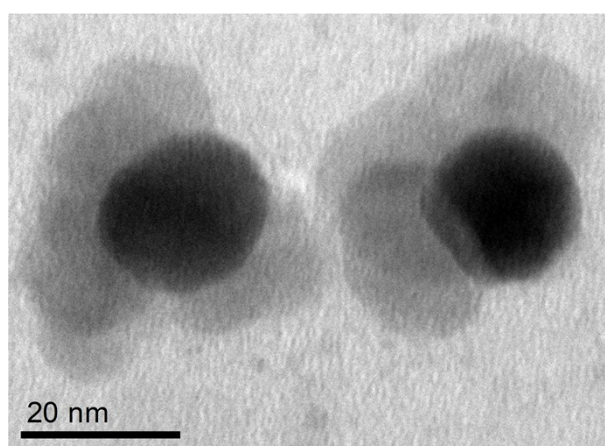

**Figure S4.** High magnification TEM image of half-shell Au/Cu<sub>2-x</sub>S hybrids.

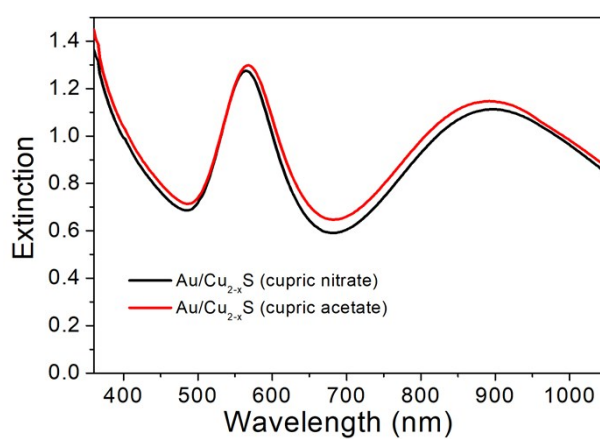

**Figure S5.** Extinction spectra of core-shell Au/Cu<sub>2-x</sub>S hybrids synthesized with cupric nitrate and cupric acetate.

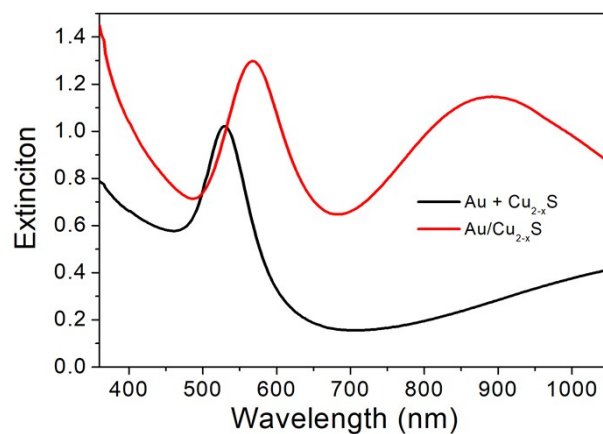

**Figure S6.** Extinction spectra of core-shell Au/Cu<sub>2-x</sub>S and physical mixture of Au and Cu<sub>2-x</sub>S.

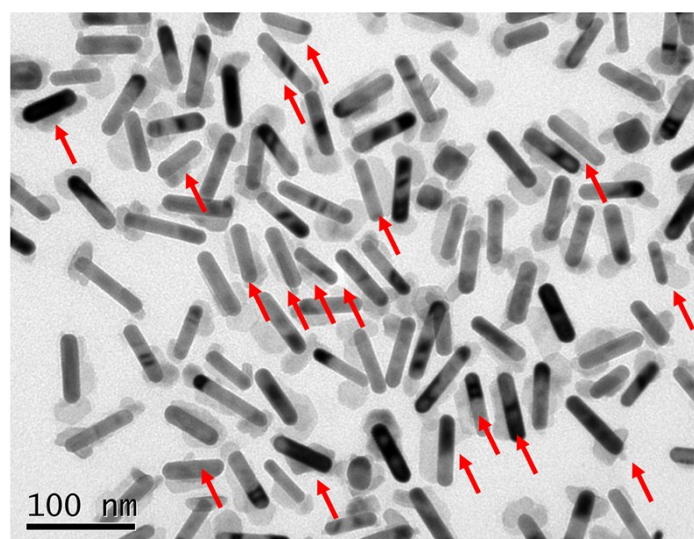

**Figure S7.** Low-magnification TEM image of Au/Cu<sub>2-x</sub>S nanorods generated after 2 hrs of reaction
